# Supplementary material for: Smartphone application for women with gestational diabetes mellitus: a study protocol for a multicentre randomised controlled trial
Source: PubMed Central journal article supplement — BMJ Open. 2017 Mar 27;7(3):e013117. doi: 10.1136/bmjopen-2016-013117 (PMC5372027; doi:10.1136/bmjopen-2016-013117), 2017-03-27
Supplement: bmjopen-2016-013117supp1.pdf [file bmjopen-2016-013117supp1.pdf]

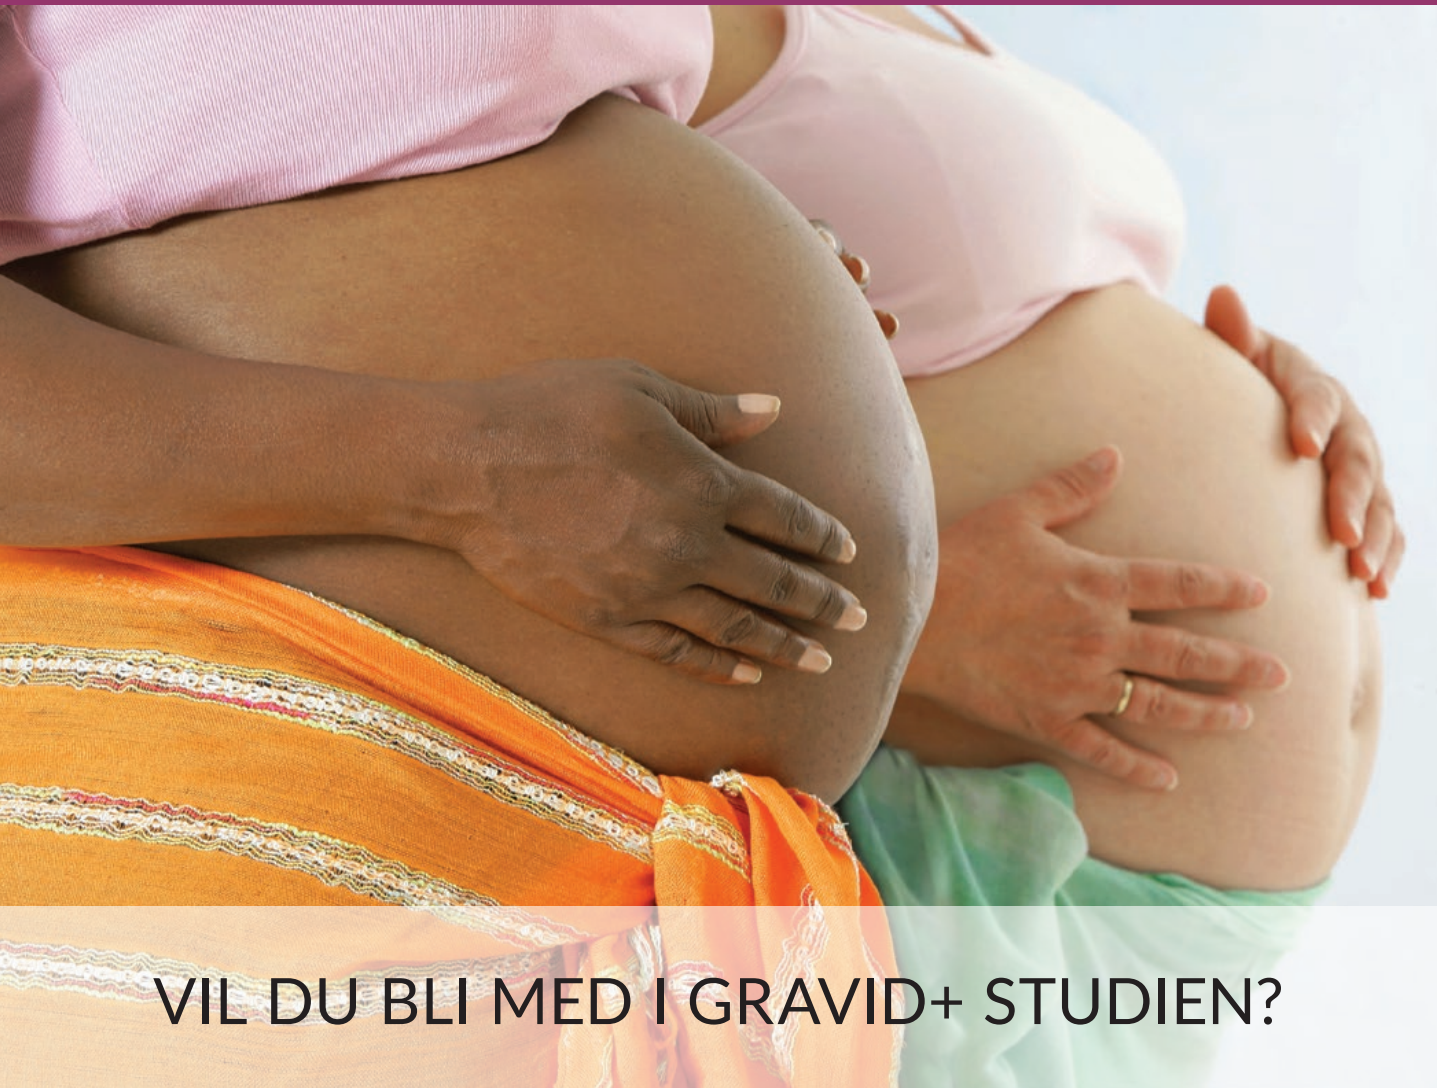

VIL DU BLI MED I GRAVID+ STUDIEN?



Gravid+ er en forskningsstudie der vi ønsker å se på betydningen av å gi informasjon om kosthold og mosjon gjennom en app som kan lastes ned på din mobiltelefon. Appen gir også mulighet til å følge med på dine blodsukkerverdier. Studien gjennomføres i samarbeid med poliklinikken der du følges opp i forbindelse med din svangerskapsdiabetes.

**Deltagelse i studien innebærer ingen ekstra undersøkelser eller besøk på poliklinikken enn det som er vanlig rutine.**

## KAN JEG BLI MED I GRAVID+?

### Ja, du kan delta dersom:

- ✓ du har din egen smarttelefon som du kan laste ned Gravid+ appen på
- ✓ det er første gang du er diagnostisert med svangerskapsdiabetes
- ✓ du ikke har kommet lenger enn svangerskapsuke 31 pluss 6 dager
- ✓ du er over 18 år
- ✓ du kan norsk, somali eller urdu

### Du kan ikke delta dersom:

- ✓ du ble diagnostisert med svangerskapsdiabetes i forbindelse med et tidligere svangerskap
- ✓ du har cøliaki, laktoseintoleranse eller lignende
- ✓ du er gravid med tvillinger

### Hva skjer hvis jeg velger å bli med i Gravid+?

Du vil først få et samtykkeskjema som du leser igjennom og skriver under på for å bekrefte at du ønsker å delta i

studien. Deretter vil du få et elektronisk spørreskjema. I dette skjemaet vil du få spørsmål om matvaner, mosjon og din generelle helse. Vi ønsker i tillegg informasjon fra sykehusjournalen din, som for eksempel din høyde og vekt og opplysninger knyttet til ditt svangerskap.

Alle som deltar, blir delt inn i to grupper. Du kommer enten i den gruppen som får appen, eller i den andre halvparten som fortsetter med vanlig svangerskapsomsorg uten å få tilgang til appen. Det er helt tilfeldig hvilken gruppe du havner i.

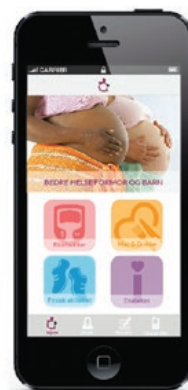

**Gruppen med app:**

Halvparten av deltagerne laster ned en app på poliklinikken. Appen kommer i tillegg til vanlig oppfølging. Appen gir deg informasjon om sunn mat og drikke, mosjon og svangerskapsdiabetes. Når du tar blodsukkeret ditt, vil det automatisk overføres til appen som gir en grafisk fremstilling og informasjon om utviklingen over tid.

**Gruppen uten app:**

Hvis du kommer i denne gruppen, mottar du vanlig svangerskapsomsorg. Det betyr at du får informasjon om sunn mat og drikke, mosjon og svangerskapsdiabetes, men ikke tilgang til appen på mobilen. Din deltagelse innebærer at vi får informasjon om dine blodsukkerverdier, enten gjennom din sykehusjournal eller via en kopi av blodsukkerdagboken din.

Alle deltagerne blir bedt om å fylle ut tre spørreskjemaer i løpet av studien: den dagen du takker ja til å delta, når du er på kontroll i uke 36, og cirka tre måneder etter fødselen. Deltagelse forutsetter

at du gjennomfører den rutinemessige glukosebelastningstesten tre måneder etter fødselen. Du får en påminnelse fra jordmor på barselavdelingen før du reiser hjem fra sykehuset. Alle deltagere blir ringt opp av en prosjektmedarbeider cirka 12 uker etter fødselen for å svare på spørsmålene i det tredje spørreskjemaet. Noen få kvinner vil da bli invitert til et personlig intervju om hvordan de opplevde deltagelsen i Gravid+.

**Hva skjer med din informasjon?**

All informasjon om deg blir behandlet konfidensielt. Det betyr blant annet at vi bruker et studienummer og ikke navnet ditt i studien.

**Hvem står bak studien?**

Høgskolen i Oslo og Akershus (HiOA) er ansvarlig for Gravid+ studien. Den gjennomføres i samarbeid med og på disse svangerskapspoliklinikkene: Oslo universitetssykehus (Ullevål sykehus og Rikshospitalet), Vestre Viken (Drammen sykehus og Bærum sykehus) og Akershus universitetssykehus (Ahus).

**Du deltar frivillig**

Det er frivillig å delta i studien, og du kan når som helst trekke deg uten å oppgi noen grunn. Alle opplysninger om deg blir da slettet.

**Mer informasjon om studien** finner du i **Kapittel A – Bakgrunnsinformasjon om Gravid+**. Informasjon om personvern og forsikring finner du i **Kapittel B – Personvern**.

## KAPITTEL A – BAKGRUNNSINFORMASJON OM GRAVID+

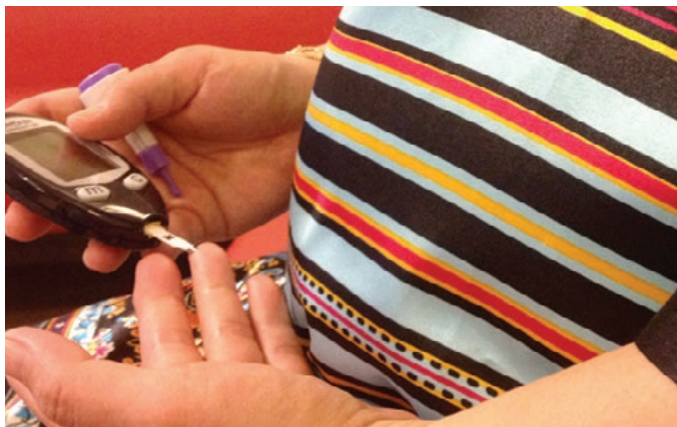

**Svangerskapsdiabetes øker blant kvinner i hele verden. Det er viktig for mors helse og barnets utvikling å holde blodsukkeret mest mulig stabilt gjennom svangerskapet og helst innenfor et normalområde på cirka 4-7,5 mmol/l.**

Blodsukkeret reguleres av insulin, et hormon som dannes i bukspyttkjertelen. Et sunt kosthold og mosjon i svangerskapet er viktig og vil bidra til at insulinet virker bedre i kroppen. De aller fleste kvinner med svangerskapsdiabetes kan unngå uheldige følger for både egen og barnets helse ved hjelp av mosjon og endret kosthold.

Det er viktig med informasjon og et godt behandlingstilbud til kvinner med svangerskapsdiabetes slik at mor og barn får best mulig helse. I dag gis informasjonen oftest muntlig sammen med noen brosjyrer. Gravid+ studien ønsker å undersøke en ny måte å gi informasjon på, nemlig gjennom en app som kan lastes ned på smarttelefonen din.

**Smarttelefonen** har blitt en viktig del av manges hverdag, og stadig flere gravide har med sin mobil til svangerskapskontrollene. Appen vil bli gitt til halvparten av de gravide i studien. Målet med å bruke appen er å gjøre det enklere for kvinnen å holde oversikt over blodsukkerverdiene ved at de blir overført automatisk til telefonen. Appen vil også gi nyttig informasjon om kosthold, mosjon og svangerskapsdia-

betes. Fordi informasjonen er tilgjengelig på smarttelefonen, er det mulig å se på den når det passer deg best. Vi håper også at appen vil motivere andre familie-medlemmer til å ha en sunn livsstil, og at dette vil fortsette å være i fokus når det er et lite barn i familien.

**Gravid+ studien ønsker å inkludere** gravide med en annen kulturell bakgrunn i tillegg til etnisk norske, ikke minst

fordi kvinner med afrikansk og asiatisk bakgrunn har en relativt høy risiko for å utvikle svangerskapsdiabetes. Appen er derfor tilgjengelig på urdu, somali og norsk.

**Hovedmålet med studien** er å finne ut om informasjon via en app fører til bedre blodsukkerverdier under og etter svangerskapet. Den viktigste blodsukkermålingen i studien er den glukosebelastningstesten som tas rutinemessig cirka 12 uker etter fødselen. Studien vil også se på forekomsten av ulike komplikasjoner i svangerskap og fødsel for både kvinner og barn. Derfor ønsker vi tilgang til journalen din slik at vi kan hente ut opplysninger om blant annet fødselsmetode, blødning i forbindelse med fødsel, lavt blodsukker hos barnet de første 24 timene etter fødselen, eller eventuell overflytting av den nyfødte til intensivavdelingen og behandling der.

**Gravid+ studien gjennomføres** på fem sykehus på Østlandet og eies av Høgskolen i Oslo og Akershus. Helsepersonell ved din svangerskapspoliklinikk vil spørre deg om du vil delta i Gravid+ studien. Hvem som rekrutterer deg til studien, kan variere mellom de fem poliklinikkene. Det kan være jordmor, diabetesjordmor eller en doktorgradstudent som vil møte deg.

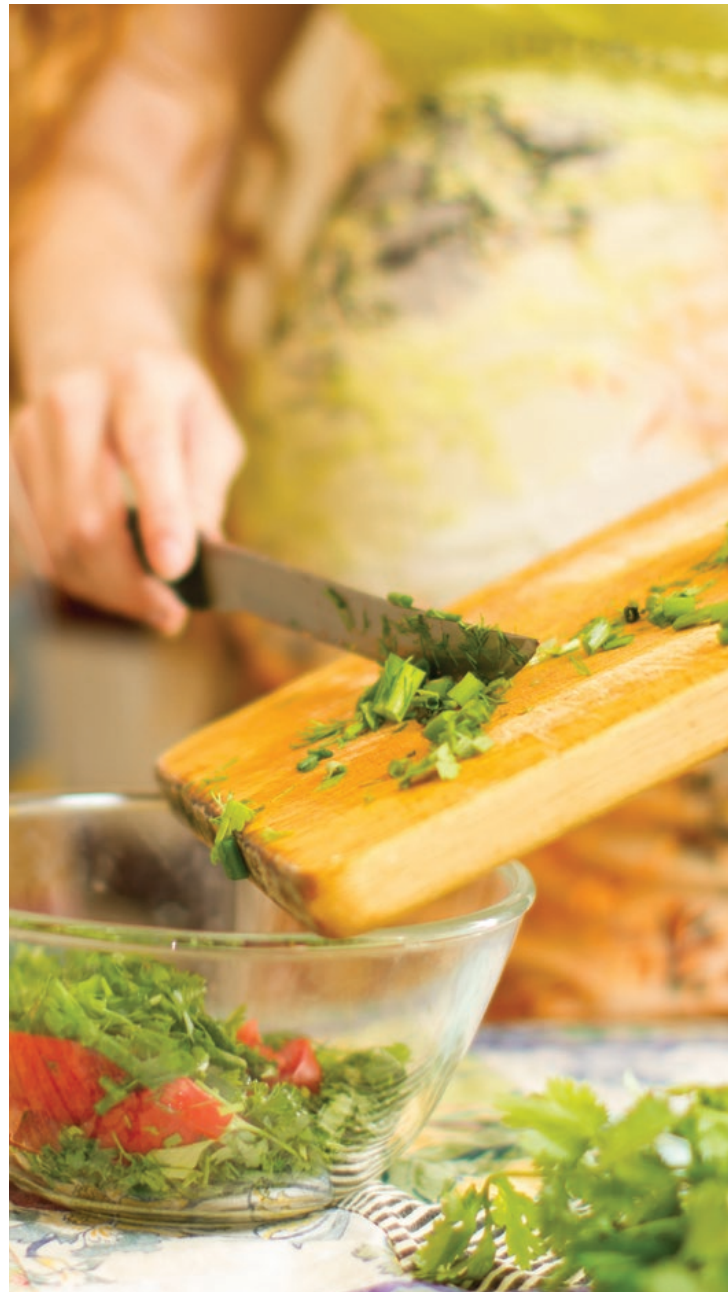

## HVA SKJER HVIS JEG VELGER Å BLI MED I STUDIEN?

Denne studien blir gjennomført som en randomisert kontrollert studie. Det betyr at du vil bli tilfeldig fordelt på en av de to gruppene. Det skjer ved hjelp av et elektronisk program som ikke kan påvirkes av den som verber deg til studien. Den ene gruppen får i tillegg til normal omsorg tilgang til appen, mens den andre gruppen mottar normal omsorg. Det er ikke mulig for deltagerne i studien å velge hvilken gruppe man ønsker å tilhøre. Alle deltagerne i Gravid+ studien vil følge de ordinære svangerskapskontrollene hos jordmor og lege på svangerskapspoliklinikken. Her vil du lære å ta blodprøver for å kontrollere blodsukkeret ditt og få informasjon om kost og mosjon. Det vil bli utført ultralyd, og legen og jordmoren vil følge nøye med på barnets utvikling. I tillegg vil en indremedisiner snakke med deg om din svangerskapsdiabetes. Dersom du ønsker å delta i studien, vil du bli bedt om å signere på samtykkeskjemaet for å bekrefte at du ønsker å være med i studien. Studien består videre av tre forskjellige spørreskjemaer, to som fylles ut underveis i svangerskapet og ett som fylles ut cirka tre måneder etter fødselen, da vi også henter inn svaret på glukosebelastningstesten.

## TIDSSKJEMA – HVA SKJER OG NÅR SKJER DET?

Nedenfor følger en oversikt over hvilke deler av prosjektet som skjer i de forskjellige ukene av svangerskapet ditt. Mens du er gravid, skjer alt på poliklinikken, bortsett fra dine daglige blodsuktermålinger. Etter fødselen tar vi telefonisk kontakt med deg. Tabellen er ment som en oversikt for deg som er deltager i Gravid+ studien.

### 1. Svangerskapskontroll før uke 32

Samtykkeskjema, Spørreskjema 1, randomisering (inndeling i gruppene med eller uten bruk av app)

### 2. Svangerskapskontroll uke 36

Spørreskjema 2

### 3. Cirka 12 uker etter fødselen

Telefonisk henvendelse fra en medarbeider i Gravid+ for å hente inn svar fra glukosebelastningstesten og fylle ut Spørreskjema 3

## MULIGE FORDELER OG ULEMPER

**Mulige fordeler** med studien er at de kvinnene som får Gravid+ appen, lettere vil kunne kontrollere blodsukkermålingene sine. De vil også på en enklere måte få tilgang til informasjon om sunn livstil og kunnskap om svangerskapsdiabetes via appen. En annen fordel kan være at kvinnene blir mer bevisste på hva de spiser og hvordan de mosjonerer under svangerskapet. Dessuten vil også andre familiemedlemmer kunne endre sin livstil.

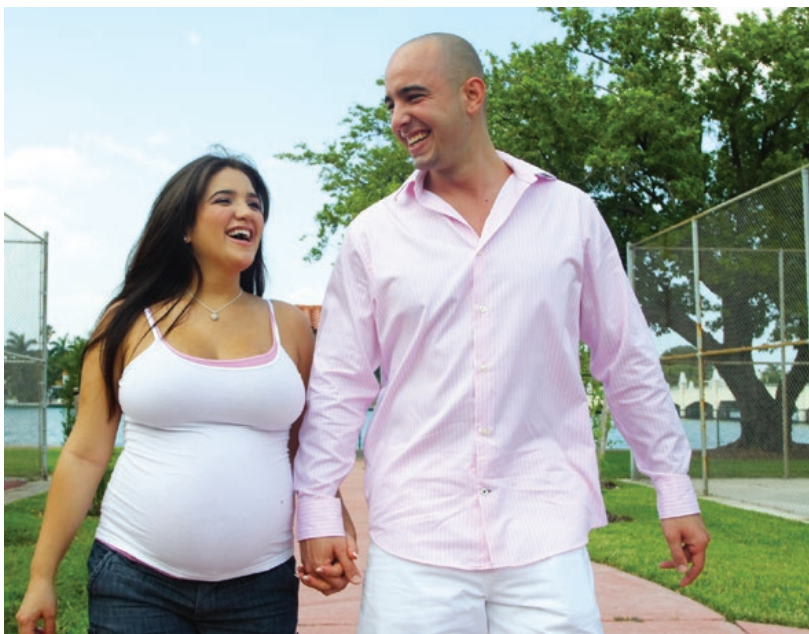

**En mulig ulempe** for alle deltagerne i studien kan være den tiden som går med til å fylle ut spørreskjemaene. Vi regner med at du vil bruke omtrent 30 minutter for å besvare et spørreskjema. Alle som deltar i studien, har viktig informasjon å bidra med, også de som ikke får tilgang til appen. Uten deres bidrag er det ikke mulig å finne ut om blodsukkeret kan kontrolleres bedre ved hjelp av appen.

### Kompensasjon

Det vil ikke bli gitt noen kompensasjon eller dekning av utgifter ettersom studien vil bli gjennomført innenfor vanlig svangerskapsomsorg og du ikke vil pådra deg noen ekstra utgifter ved at du deltar.

### Annet

Hvis det underveis blir gjort endringer i hvordan studien gjennomføres, vil du som deltager få beskjed om dette så raskt som mulig. Du vil da kunne vurdere på nytt om du er villig til å delta videre i studien.



## KAPITTEL B – PERSONVERN

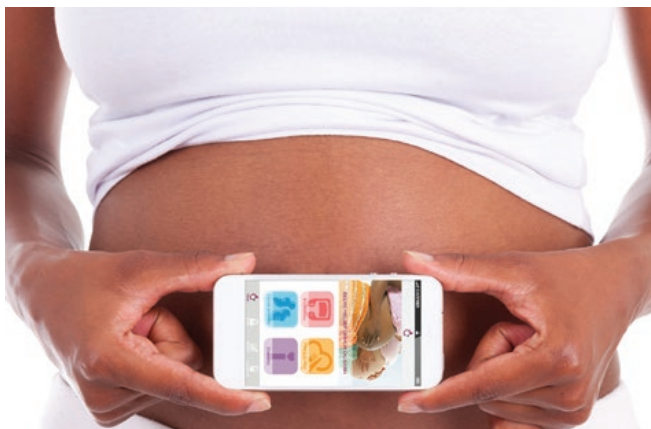

**Dine opplysninger vil kun bli brukt til forskning. Ingen informasjon vil bli gitt videre til andre. Studien følger helseforskningsloven og personopplysningsloven. Vi vil respektere ditt privatliv.**

### **Hva skjer med prøvene og informasjonen om deg?**

Dersom du deltar i Gravid+ studien, vil de opplysningene som registreres om deg, være alder, sivilstatus, fødeland, svangerskapsuke, høyde, vekt, utdanning, antall år du har bodd i Norge, hvilket morsmål du har, og om du har arbeid utenfor hjemmet. Vi ønsker også å få vite om det er andre i familien din som har diabetes. Videre ønsker vi å samle inn opplysninger som blodsukkerverdier, amming, kosthold og livsstil.

Vi vil samtidig hente ut informasjon fra din journal om hvordan du fødte barnet, fødselskomplikasjoner og utfallet for barnet, for eksempel om barnet ble overflyttet til nyfødtintensiven. Vi vil også be om telefonnummeret ditt slik at vi kan kontakte deg.

**I spørreskjemaene vil du få spørsmål** om hva du spiser og drikker og hvor ofte du spiser. Vi vil også spørre om hvordan du mosjonerer, hvilke aktiviteter du foretrekker, og hvor lenge og hvor ofte du mosjonerer. Du vil få spørsmål om hvordan du har det både fysisk og psykisk under svangerskapet, og om selve svangerskapet. Vi vil videre stille noen spørsmål om svangerskapsdiabetes. Informasjonen som blir samlet inn om deg, vil bli lagret på en sikker forskningsserver ved UNIK - Universitetsenteret på Kjeller, og vil ikke bli knyttet opp mot andre registre.

### **Den informasjonen du gir oss, vil bli sikret ved hjelp av en pinkode som er unik for deg.**

All informasjon, som svar på spørreskjemaene, blir levert direkte til en sikker elektronisk server. Du kan selv bestemme sikkerhetsnivået ved bruk av appen, blant annet ved å velge om du alltid ønsker å bruke din Gravid+ pinkode for å åpne appen. Vi oppfordrer deg til å gjøre dette hvis du ikke bruker passord for å låse opp telefonen din hver gang du bruker den.

Den informasjonen som registreres om deg, skal kun brukes slik som beskrevet under målet med studien. Alle opplysningene vil bli behandlet uten navn og fødselsnummer slik at du ikke kan bli gjenkjent. En kode vil knytte deg til dine opplysninger gjennom en navneliste. Det er kun autorisert personell knyttet til prosjektet som har adgang til denne navnelisten, og som kan finne tilbake til deg. Det er bare sykehusnotater fra svangerskap og fødsel vi er interessert i, og alle de som har tilgang til disse opplysningene, har taushetsplikt. Personidentifiserbare opplysninger fra Gravid+ studien blir slettet innen begynnelsen av 2018. Den innsamlede informasjonen vil da foreligge i anonymisert

form. Det er kun forskere med tilknytning til Gravid+ studien som får tilgang til det innsamlede materialet.

### **RETT TIL INNSYN OG SLETNING AV OPPLYSNINGER OM DEG OG SLETNING AV PRØVER**

Dersom du sier ja til å delta i studien, har du rett til å få vite hvilke opplysninger som er registrert om deg. Du har videre mulighet til å få rettet opp eventuelle feil i disse opplysningene. Det er frivillig å delta i Gravid+ studien, og hvis du velger å trekke deg, kan du få alle opplysninger om deg slettet, med mindre disse opplysningene allerede er analysert eller benyttet i vitenskapelige publikasjoner.

#### **Annet**

Gravid+ studien er finansiert av Norges forskningsråd. Høgskolen i Oslo og Akershus er ansvarlig for studien. Det har ikke vært nødvendig å forsikre deltagerne ettersom studien inngår i vanlig rutineomsorg under svangerskapet. Resultatene fra studien vil bli offentliggjort i internasjonale tidsskrifter og relevante fagfora.

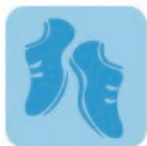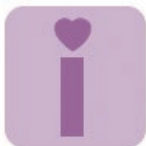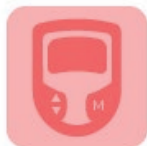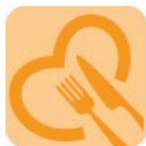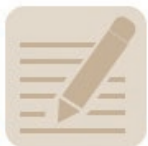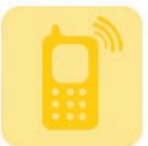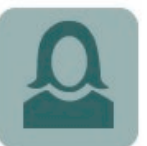



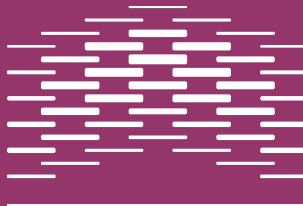

HØGSKOLEN I OSLO  
OG AKERSHUS

---

## KONTAKTOPPLYSNINGER:

Hvis du senere ønsker å trekke deg eller har spørsmål til studien, kan du kontakte stipendiat Iren Borgen ved Høgskolen i Oslo og Akershus, telefon: 913 21 061; e-post: [iren.borgen@hioa.no](mailto:iren.borgen@hioa.no) eller prosjektleder Mirjam Lukasse, telefon: 957 71 864; e-post: [mirjam.lukasse@hioa.no](mailto:mirjam.lukasse@hioa.no)
