# Supplementary material for: Smartphone application for women with gestational diabetes mellitus: a study protocol for a multicentre randomised controlled trial
Source: PubMed Central journal article supplement — BMJ Open. 2017 Mar 27;7(3):e013117. doi: 10.1136/bmjopen-2016-013117 (PMC5372027; doi:10.1136/bmjopen-2016-013117), 2017-03-27
Supplement: bmjopen-2016-013117supp2.pdf [file bmjopen-2016-013117supp2.pdf]

## Samtykke til deltakelse i Gravid+ studien

Jeg samtykker at jeg har gjort meg godt kjent med innholdet i Gravid+ studien og med hva studien innebærer slik det fremgår i Gravid+ informasjonsbrosjyren. Jeg bekrefter herved at jeg har fått informasjonsbrosjyren og at jeg er villig til å delta i Gravid+.

---

(Signert av studiedeltaker, dato)

Jeg bekrefter å ha gitt informasjon om Gravid+ studien

---

(Signert av lokal prosjektansvarlig, rolle i studien, dato)

Kopi til deltager

## Samtykke til deltakelse i Gravid+ studien

Jeg samtykker at jeg har gjort meg godt kjent med innholdet i Gravid+ studien og med hva studien innebærer slik det fremgår i Gravid+ informasjonsbrosjyren. Jeg bekrefter herved at jeg har fått informasjonsbrosjyren og at jeg er villig til å delta i Gravid+.

---

(Signert av studiedeltaker, dato)

Jeg bekrefter å ha gitt informasjon om Gravid+ studien

---

(Signert av lokal prosjektansvarlig, rolle i studien, dato)
